# Supplementary material for: Expression and characterization of a Talaromyces marneffei active phospholipase B expressed in a Pichia pastoris expression system
Source: PubMed Central journal article supplement (PMC5148023; doi:10.1038/emi.2016.119), 2016-11-23
Supplement: emi2016119x1.pdf [file emi2016119x1.pdf]

**A**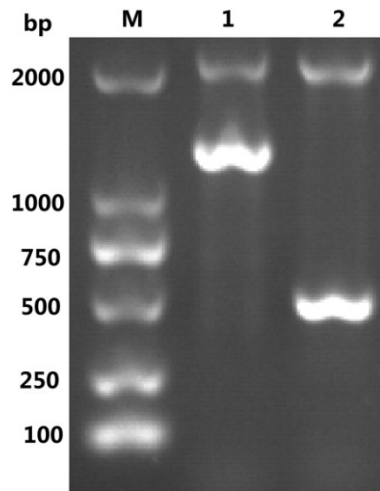**B**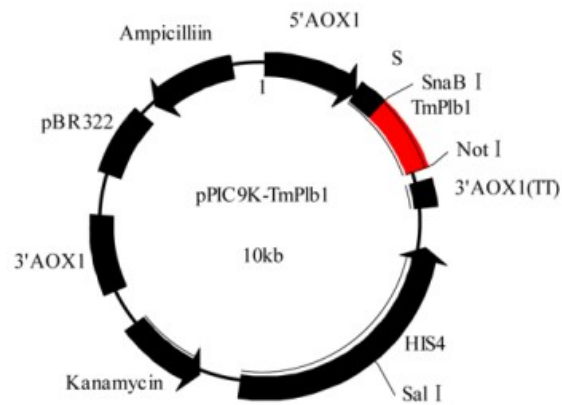

**Supplementary Figure S1 (A)** Transformation of pPIC9K-*TmPlb1* into *P. pastoris* GS115 competent cells. M, DNA Marker; 1, PCR with 5' and 3' AOX1 primers using pPIC9K-*TmPlb1*-GS115 as template; 2, PCR with 5' and 3' AOX1 primers using pPIC9K-GS115 as template. **(B)** The schematic diagrams of pPIC9K-*TmPlb1*.
