# Supplementary material for: Expression and characterization of a Talaromyces marneffei active phospholipase B expressed in a Pichia pastoris expression system
Source: PubMed Central journal article supplement (PMC5148023; doi:10.1038/emi.2016.119), 2016-11-23
Supplement: emi2016119x2.pdf [file emi2016119x2.pdf]

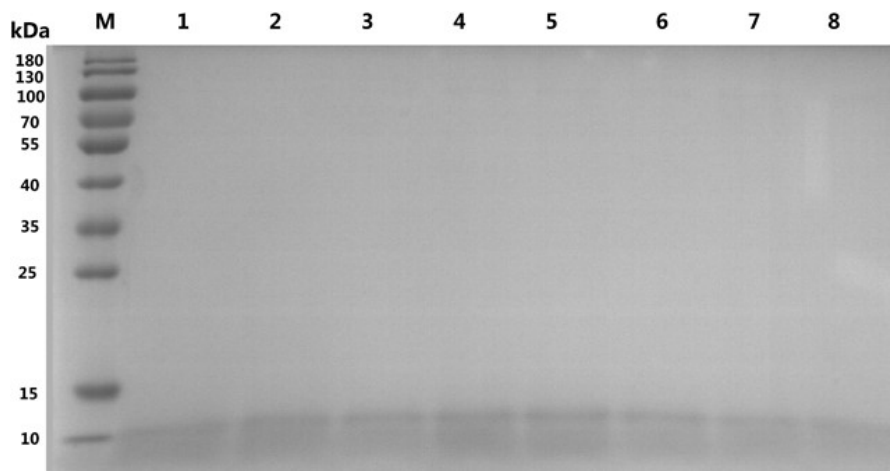

**Supplementary Figure S2** Protein expression in *P. pastoris* GS115 with empty pPIC9K plasmids. M, standard protein marker (Fermentas); lanes 1–8, *P. pastoris* GS115 induced with methanol for 6, 12, 24, 48, 72, 96, 120 and 144 h.
